# Supplementary material for: Magnolia officinalis and neuronal mitochondrial dysfunction: a potential therapeutic approach for aging or chemotherapy-induced peripheral neuropathy
Source: publisher site journal article supplement (doi:10.1515/tjb-2025-0290), 2025-09-22
Supplement: Supplementary file 1 [file j_tjb-2025-0290_suppl_001.docx]

**Supplementary Figure**


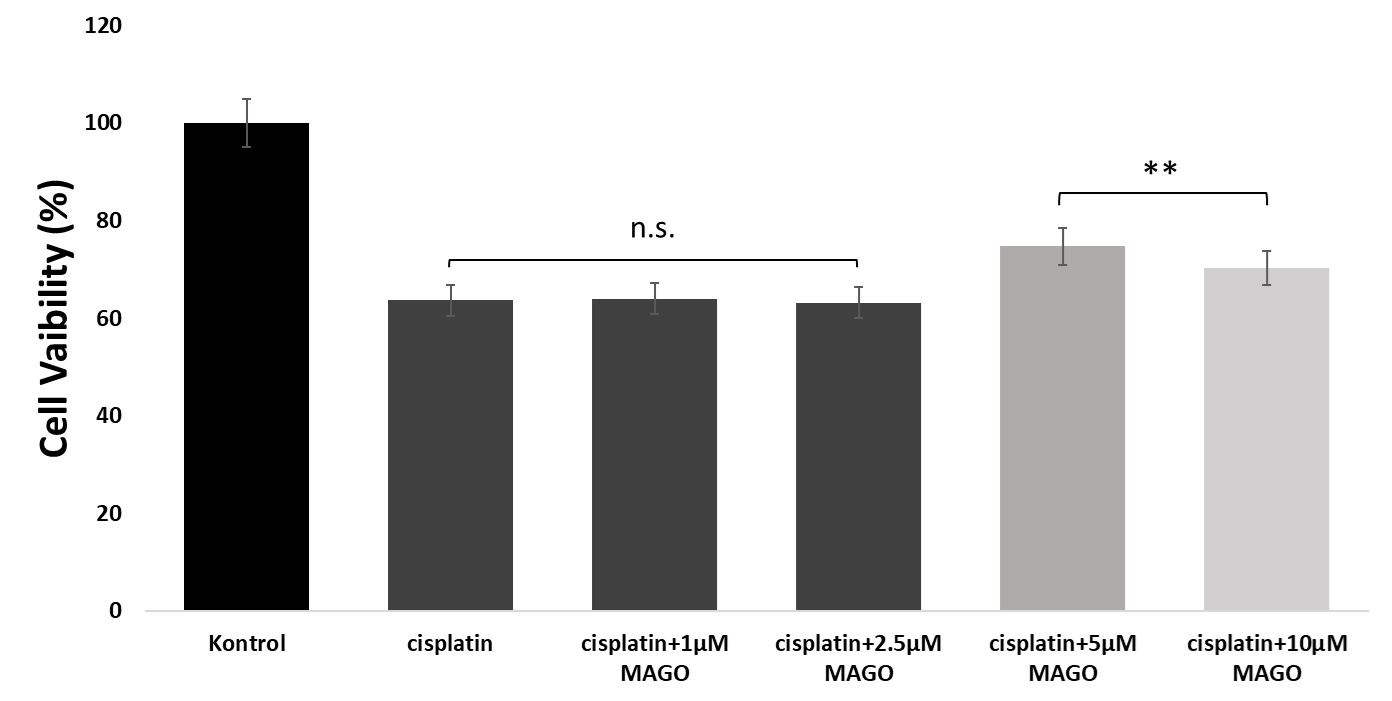


*Supplementary Figure 1: Preliminary study of cisplatin and MAGO on cell viability. 5 µM MAGO treated group **p<0.01 vs. 10 µM MAGO treated group.*
